# Supplementary material
Source: PubMed Central journal article supplement (PMC10713015)
Supplement: JSLHR-66-3844-s001.pdf [file JSLHR-66-3844-s001.pdf]

**Supplemental Material S1.** Descriptive analyses across age category, gender, and swallow tasks.

| Age Category (years) | Gender | Task           | Time-to-LVC     |                |                |                       |                  | Mean ± SD (frames) | LVCd            |                |                |                       |                  |                    |
|----------------------|--------|----------------|-----------------|----------------|----------------|-----------------------|------------------|--------------------|-----------------|----------------|----------------|-----------------------|------------------|--------------------|
|                      |        |                | Mean ± SD (ms)  | 95% CI (ms)    | Median (ms)    | Minimum, Maximum (ms) | (n) <sup>a</sup> |                    | Mean ± SD (ms)  | 95% CI (ms)    | Median (ms)    | Minimum, Maximum (ms) | (n) <sup>a</sup> | Mean ± SD (frames) |
| 21-39                | Male   | 5-mL Thin      | 192.16 ± 75.68  | 165.75, 218.56 | 200.00         | 33.33, 433.33         | 34               | 5.76± 2.27         | 428.4 ± 133.49  | 381.83, 474.98 | 416.67         | 233.33, 999.00        | 34               | 12.84 ± 4.00       |
|                      |        | Cup Thin       | 128.43 ± 107.66 | 90.87, 166.00  | 133.33         | -366.67, 300.00       | 34               | 3.85± 3.23         | 527.42 ± 133.49 | 476.44, 578.40 | 500.00         | 333.33, 999.00        | 34               | 15.81 ± 4.00       |
|                      |        | 5-mL Nectar    | 184.31 ± 65.26  | 161.38, 208.32 | 166.67         | 66.67, 366.67         | 34               | 5.52±1.96          | 453.89 ± 135.72 | 406.54, 501.25 | 433.33         | 266.67, 999.00        | 34               | 13.61 ± 4.07       |
|                      |        | Cup Nectar     | 151.52 ± 55.96  | 131.72, 170.24 | 133.33         | 33.33, 266.67         | 34               | 4.54±1.68          | 487.23 ± 129.37 | 442.08, 532.37 | 433.33         | 300.00, 999.00        | 34               | 14.60 ± 3.88       |
|                      |        | 5-mL Honey     | 185.29 ± 65.75  | 162.35, 208.23 | 166.67         | 100.00, 366.67        | 34               | 5.55±1.97          | 454.87 ± 137.9  | 406.76, 502.99 | 433.33         | 266.67, 999.00        | 34               | 13.63 ± 4.13       |
|                      |        | 5-mL Pudding   | 190.20 ± 71.32  | 165.31, 215.08 | 166.67         | 66.67, 366.67         | 34               | 5.70± 2.14         | 399.02 ± 94.45  | 366.06, 431.98 | 383.33         | 233.33, 600.00        | 34               | 11.96 ± 2.83       |
|                      | Solid  | 233.33 ± 78.28 | 206.02, 260.65  | 233.33         | 100.00, 433.33 | 34                    | 6.99± 2.35       | 387.25 ± 89.52     | 356.02, 418.49  | 400.00         | 233.33, 566.67 | 34                    | 11.61 ± 2.68     |                    |
|                      | Female | 5-mL Thin      | 160.19 ± 42.78  | 145.71, 174.66 | 166.67         | 100.00, 266.67        | 36               | 4.80± 1.28         | 406.48 ± 80.01  | 379.41, 433.55 | 400.00         | 266.67, 600.00        | 36               | 12.18 ± 2.40       |
|                      |        | Cup Thin       | 121.27 ± 196.70 | 54.72, 187.82  | 100.00         | -566.67, 999.00       | 36               | 3.64±5.90          | 512.01 ± 188.68 | 448.17, 575.85 | 466.67         | 333.33, 1300.00       | 36               | 15.35 ± 5.66       |
|                      |        | 5-mL Nectar    | 145.37 ± 51.73  | 127.87, 162.87 | 133.33         | 33.33, 300.00         | 36               | 4.36±1.55          | 430.53 ± 132.34 | 385.75, 475.31 | 433.33         | 233.33, 999--         | 36               | 12.91 ± 3.97       |
|                      |        | Cup Nectar     | 136.11 ± 59.83  | 115.87, 156.35 | 133.33         | 66.67, 400.00         | 36               | 4.08±1.79          | 453.70 ± 91.99  | 422.58, 484.83 | 433.33         | 266.67, 666.67        | 36               | 13.60 ± 2.76       |
|                      |        | 5-mL Honey     | 162.96 ± 110.92 | 125.43, 200.49 | 166.67         | -366.67, 400.00       | 36               | 4.88±3.32          | 423.15 ± 126.19 | 380.45, 465.84 | 400.00         | 266.67, 933.33        | 36               | 12.68 ± 3.78       |
| 5-mL Pudding         |        | 164.81 ± 63.22 | 143.43, 186.20  | 166.67         | 33.33, 300.00  | 36                    | 4.94±1.90        | 396.30 ± 67.04     | 373.61, 418.98  | 366.67         | 266.67, 500.00 | 36                    | 11.88 ± 2.01     |                    |

|       |        |              |                 |                |        |                  |    |             |                 |                |        |                 |    |               |
|-------|--------|--------------|-----------------|----------------|--------|------------------|----|-------------|-----------------|----------------|--------|-----------------|----|---------------|
|       |        | Solid        | 188.89 ± 73.46  | 164.03, 213.75 | 166.67 | 33.33, 333.33    | 36 | 5.66± 2.20  | 405.56 ± 90.68  | 374.88, 436.24 | 383.33 | 233.33, 633.33  | 36 | 12.16 ± 2.72  |
| 40-59 | Male   | 5-mL Thin    | 172.38± 76.05   | 146.26, 198.5  | 166.67 | -133.33, 333.33  | 35 | 5.17± 2.28  | 451.40 ± 134.52 | 405.19, 497.61 | 433.33 | 200.00, 999.00  | 35 | 13.53 ± 4.03  |
|       |        | Cup Thin     | 140.00 ± 111.38 | 101.74, 178.26 | 133.33 | -266.67, 433.33  | 35 | 4.20± 3.34  | 533.33 ± 136.48 | 486.45, 580.22 | 533.33 | 300.00, 1000.00 | 35 | 15.99 ± 4.09  |
|       |        | 5-mL Nectar  | 174.29 ± 43.60  | 159.31, 189.26 | 166.67 | 100.00, 266.67   | 35 | 5.22±1.31   | 431.43 ± 87.05  | 401.53, 461.33 | 433.33 | 266.67, 633.33  | 35 | 12.93 ± 2.61  |
|       |        | Cup Nectar   | 155.24 ± 91.45  | 123.83, 186.65 | 133.33 | -233.33, 366.67  | 35 | 4.65± 2.74  | 518.10 ± 256.46 | 430.00, 606.19 | 466.67 | 333.33, 1933.33 | 35 | 15.53 ± 7.69  |
|       |        | 5-mL Honey   | 181.90 ± 61.22  | 160.87, 202.93 | 166.67 | 66.67, 333.33    | 35 | 5.45±1.84   | 440.00 ± 113.99 | 400.84, 479.16 | 433.33 | 233.33, 733.33  | 35 | 13.19 ± 3.42  |
|       |        | 5-mL Pudding | 165.71 ± 63.39  | 143.94, 187.49 | 166.67 | 33.33, 333.33    | 35 | 4.97±1.90   | 418.10 ± 93.70  | 385.91, 450.28 | 400.00 | 233.33, 666.67  | 35 | 12.53 ± 2.81  |
|       |        | Solid        | 213.33 ± 86.77  | 183.53, 243.14 | 200.00 | 66.67, 433.33    | 35 | 6.39±2.60   | 403.81 ± 127.51 | 360.01, 447.61 | 366.67 | 166.67, 733.33  | 35 | 12.10 ± 3.82  |
|       | Female | 5-mL Thin    | 146.67 ± 102.33 | 111.52, 181.82 | 133.33 | -300.00, 333.33  | 35 | 4.40±3.07   | 518.99 ± 186.37 | 454.97, 583.01 | 500.00 | 300.00, 999.00  | 35 | 15.56 ± 5.59  |
|       |        | Cup Thin     | 125.71 ± 58.90  | 105.48, 145.95 | 133.33 | 33.33, 300.00    | 35 | 3.77±1.77   | 561.88 ± 133.03 | 516.18, 607.57 | 566.67 | 333.33, 999.00  | 35 | 16.84 ± 3.99  |
|       |        | 5-mL Nectar  | 159.97 ± 174.15 | 100.15, 219.80 | 133.33 | -333.33, 999.00  | 35 | 4.80±5.22   | 488.54 ± 148.52 | 437.53, 539.56 | 433.33 | 333.33, 999.00  | 35 | 14.64 ± 4.45  |
|       |        | Cup Nectar   | 109.5 ± 350.79  | -11.01, 230.00 | 133.33 | -1700.00, 999.00 | 35 | 3.28± 10.51 | 578.07 ± 336.02 | 462.64, 693.50 | 533.33 | 333.33, 2366.67 | 35 | 17.33 ± 10.07 |
|       |        | 5-mL Honey   | 160.95 ± 53.92  | 142.43, 179.48 | 166.67 | 66.67, 300.00    | 35 | 4.82± 1.62  | 450.48 ± 98.48  | 416.65, 484.30 | 433.33 | 333.33, 700.00  | 35 | 13.50 ± 2.95  |
|       |        | 5-mL Pudding | 165.71 ± 48.16  | 149.17, 182.26 | 166.67 | 33.33, 266.67    | 35 | 4.97± 1.44  | 451.43 ± 95.09  | 418.76, 484.09 | 433.33 | 300.00, 733.33  | 35 | 13.53 ± 2.85  |
|       |        | Solid        | 200.95 ± 82.64  | 172.57, 229.34 | 166.67 | 33.33, 466.67    | 35 | 6.02± 2.48  | 445.71 ±        | 409.07, 482.36 | 433.33 | 266.67, 666.67  | 35 | 13.36 ± 3.20  |

|              |        |              |                 |                |        |                 |    |            |                 |                |        |                 |    |              |
|--------------|--------|--------------|-----------------|----------------|--------|-----------------|----|------------|-----------------|----------------|--------|-----------------|----|--------------|
|              |        |              |                 |                |        |                 |    |            | 106.67          |                |        |                 |    |              |
| 60+          | Male   | 5-mL Thin    | 183.33 ± 62.06  | 150.26, 216.40 | 183.33 | 66.67, 266.67   | 16 | 5.50± 1.86 | 429.17 ± 59.47  | 397.48, 460.86 | 416.67 | 333.33, 533.33  | 16 | 12.86 ± 1.78 |
|              |        | Cup Thin     | 185.42 ± 130.51 | 115.87, 254.96 | 166.67 | 33.33, 500.00   | 16 | 5.56± 3.91 | 535.42 ± 102.90 | 480.59, 590.25 | 550.00 | 366.67, 733.33  | 16 | 16.05 ± 3.08 |
|              |        | 5-mL Nectar  | 225.00 ± 102.92 | 170.16, 279.84 | 233.33 | 66.67, 466.67   | 16 | 6.74± 3.09 | 458.33 ± 109.88 | 399.78, 516.89 | 433.33 | 300.00, 633.33  | 16 | 13.74 ± 3.29 |
|              |        | Cup Nectar   | 193.75 ± 91.26  | 145.12, 242.38 | 200.00 | 66.67, 433.33   | 16 | 5.81± 2.74 | 493.75 ± 91.26  | 445.12, 542.38 | 483.33 | 333.33, 666.67  | 16 | 14.80 ± 2.74 |
|              |        | 5-mL Honey   | 222.92 ± 88.38  | 175.82, 270.01 | 200.00 | 100.00, 433.33  | 16 | 6.68± 2.65 | 454.17 ± 118.56 | 390.99, 517.34 | 416.67 | 300.00, 700.00  | 16 | 13.61 ± 3.55 |
|              |        | 5-mL Pudding | 191.67 ± 73.54  | 152.48, 230.85 | 183.33 | 0.00, 300.00    | 16 | 5.75± 2.20 | 447.92 ± 95.04  | 397.27, 498.56 | 433.33 | 266.67, 666.67  | 16 | 13.43 ± 2.85 |
|              |        | Solid        | 239.58 ± 93.67  | 189.67, 289.49 | 233.33 | 100.00, 466.67  | 16 | 7.18± 2.81 | 410.42 ± 84.08  | 365.61, 455.22 | 400.00 | 266.67, 600.00  | 16 | 12.30 ± 2.52 |
| 60+ (cont'd) | Female | 5-mL Thin    | 166.62 ± 218.92 | 95.65, 237.58  | 133.33 | -200.00, 999.00 | 39 | 4.99± 6.56 | 517.07 ± 154.93 | 466.85, 567.29 | 466.67 | 300.00, 999.00  | 39 | 15.50 ± 4.64 |
|              |        | Cup Thin     | 99.15 ± 180.88  | 40.51, 157.78  | 133.33 | -433.33, 433.33 | 39 | 2.97± 5.42 | 641.85 ± 267.48 | 555.15, 728.56 | 533.33 | 233.33, 1300.00 | 39 | 19.24 ± 8.02 |
|              |        | 5-mL Nectar  | 132.48 ± 85.66  | 104.71, 160.25 | 133.33 | -200.00, 266.67 | 39 | 3.97± 2.57 | 541.88 ± 177.66 | 484.29, 599.47 | 500.00 | 233.33, 1066.67 | 39 | 16.24 ± 5.33 |
|              |        | Cup Nectar   | 76.07 ± 225.94  | 2.83, 149.31   | 133.33 | -800.00, 600.00 | 39 | 2.28± 6.77 | 635.04 ± 243.51 | 556.11, 713.98 | 533.33 | 333.33, 1466.67 | 39 | 19.04 ± 7.30 |
|              |        | 5-mL Honey   | 133.31 ± 237.09 | 56.45, 210.16  | 166.67 | -733.33, 999.00 | 39 | 3.99± 7.11 | 607.67 ± 229.68 | 533.21, 682.12 | 533.33 | 333.33, 1266.67 | 39 | 18.21 ± 6.88 |
|              |        | 5-mL Pudding | 156.41 ± 125.69 | 115.67, 197.15 | 166.67 | -500.00, 400.00 | 39 | 4.69± 3.77 | 467.52 ± 124.84 | 427.05, 507.99 | 433.33 | 233.33, 1066.67 | 39 | 14.01 ± 3.74 |
|              |        | Solid        | 221.37 ± 97.18  | 189.87, 252.87 | 200.00 | 66.67, 500.00   | 39 | 6.64± 2.91 | 470.94 ± 145.13 | 423.89, 517.99 | 466.67 | 233.33, 1066.67 | 39 | 14.12 ± 4.35 |

*Note.* ms = milliseconds

<sup>a</sup> reflects the number of swallows rated in the corresponding category.
